# Supplementary material
Source: publisher figshare collection journal article supplement (https://springernature.figshare.com/articles/dataset/_/21533757)
Supplement: Supplementary file 1 [file 1]

## Sheet: Sheet1
Supplementary Fig.14
	Counts per second
Binding energy (eV)	CIP	NERIP800	NERIP1200	NERIP1600
1350.08	84272.5	71659.4	77166.9	73241.8
1349.08	83167.5	70442.1	78359.8	72649.8
1348.08	86274.2	69940.1	76092.7	72521.5
1347.08	86389.2	70140.8	77383.8	71777.6
1346.08	85506.8	70233.7	76259.2	71278.2
1345.08	82683.6	69333	75935	71826.9
1344.08	85398.1	72054.3	77546.6	72243.3
1343.08	84347.3	69544.5	74703.3	71651.8
1342.08	85100.6	68721.5	74812.4	72101.2
1341.08	83768.3	69982	75223.8	71493.7
1340.08	85689.9	70188.7	75148.5	72254.2
1339.08	84705.5	68631.2	76527.8	69773.9
1338.08	86343.7	69214.4	75512.4	70701.7
1337.08	86238.9	68149	74970.5	70453.1
1336.08	84743.9	69161.7	74553.3	70762.3
1335.08	82720.9	70640.2	76059.3	70766.8
1334.08	83123.3	70228.4	75394.9	71757.1
1333.08	84304.6	68879.6	77110.3	71176
1332.08	84317.3	68996.1	74120.8	71381.3
1331.08	84598.5	70398.8	76485.4	70065.3
1330.08	82692.9	67529.1	75899.4	71027
1329.08	82821.8	68329	74045.4	71612.3
1328.08	83139.9	68069	74929.2	72344.3
1327.08	84957.2	69517.7	75731.3	71869.1
1326.08	82850.3	69115.1	73531.9	73051.9
1325.08	82534.8	68688.3	74682.2	70872.5
1324.08	82549.8	68350.9	75220.5	69937.2
1323.08	83501.9	66785.6	75270.1	70455.4
1322.08	84079	68660.2	77797.9	70609
1321.08	81519	69504.6	74331.2	72282.5
1320.08	83369	70581.1	75862	70785.8
1319.08	83988.6	70363.7	74990.5	72344
1318.08	82696.7	70956.1	75834.9	72265.1
1317.08	84780.1	69250.8	74632.6	71883.9
1316.08	83349	68708.6	75304.9	71353.2
1315.08	83134.1	68599.6	76641.9	71281.8
1314.08	83725.9	68693.2	74845.8	71162
1313.08	84107	69096.5	73896.4	70789.3
1312.08	83107.6	67969.9	72094.2	71591.3
1311.08	82541.7	67743.9	74427.8	70258.7
1310.08	84076.6	68384.4	76159.3	72798.4
1309.08	85276.3	67788.1	75375.3	71682.4
1308.08	83821.7	68223.4	76656.9	69852
1307.08	82862.3	67560.5	75855.3	71078.2
1306.08	83703	68500.7	75173	72660.8
1305.08	85527	70309	75805.5	72138
1304.08	85120.3	70449.5	76336.6	71107.7
1303.08	84477.7	69433.9	76868.9	73395.1
1302.08	83017.3	69640	75020	72888.3
1301.08	82996.9	70135.6	75971.4	73334.4
1300.08	84288.9	68895.1	77842.4	73467.6
1299.08	83848.6	68522.9	75473	71970.9
1298.08	85296.7	69027.4	74470.1	73324.6
1297.08	84087.8	69301.2	75532.8	72305.4
1296.08	84997.7	69102.6	76560.9	73353.7
1295.08	83975	68141.6	75834.1	73211.4
1294.08	84348.7	69932.4	76429.2	73401.5
1293.08	84081.3	69086.1	78200.1	73212.9
1292.08	84521.2	68730.2	75093.9	72263.4
1291.08	84162.5	69732.5	76045.3	73808.1
1290.08	85540	70223.8	76983.2	73772.8
1289.08	85972	70123.8	78297.3	73873.6
1288.08	86648	67956	77582.8	72819.6
1287.08	84386.7	70901.1	76987.5	73186.7
1286.08	84960.4	70140.1	78492.1	73827.6
1285.08	84309.3	70274.1	77463	72549.9
1284.08	85697.1	69164.7	77029.7	76765.3
1283.08	86992.3	70032.8	77465	74887.4
1282.08	86328.7	68089.7	79849.1	75151.3
1281.08	85443.8	70652.5	78491.9	74792.6
1280.08	85159.8	71139.5	77545.9	74819.5
1279.08	85544.2	69341	78906.9	73758.9
1278.08	86181.4	69606.8	79069.1	76032.7
1277.08	86094.9	71937.4	81087.7	75489.1
1276.08	87686.4	71325.6	78237.3	74536
1275.08	86760.7	71681.5	79658.2	74247.5
1274.08	86496.2	69580	80079.3	74088.2
1273.08	86983.6	70960.7	79349.1	76009.5
1272.08	86387.8	72523.4	80441.5	77449.6
1271.08	87771	72461.2	79038.2	75715.3
1270.08	87252.8	72685	78439	75996.5
1269.08	87080.4	71115.5	80079.4	77229.6
1268.08	87376.4	73102	78813.5	75007.2
1267.08	88102.6	73663.6	80706	74544.2
1266.08	88656.7	72419	78476.2	77406.4
1265.08	89770	74371.5	80406.8	76706.8
1264.08	90027	71522.7	78972.1	78004
1263.08	90020	70926.6	81205.3	77799.2
1262.08	89183.8	72492	82977.3	77540.8
1261.08	89346.8	74375	83405.7	76187.8
1260.08	89773.9	72601.3	81669.9	77558.1
1259.08	90721.3	72730	81700.9	77396.9
1258.08	90289.7	76085.1	80816	78310.7
1257.08	90300.3	72431.3	82009.8	77110.8
1256.08	90939.6	74428.2	83095.9	79749.3
1255.08	90230.1	73273.1	83016	80362.5
1254.08	91487.7	72310.5	85331.5	78439.4
1253.08	91504.6	71597.8	84928.7	79300.3
1252.08	92254.2	72759.7	83874.5	78650.9
1251.08	93046.5	73913.8	84160.1	80221.9
1250.08	93465	75241.5	83963.8	82203.4
1249.08	91059	75543.2	85654.3	81755.9
1248.08	94201.7	76387.7	87170.4	82627.8
1247.08	95827.7	77488.2	88568.9	83096.6
1246.08	95012.6	76853.8	86129.8	82709.1
1245.08	97982.4	77261	87907	82703.4
1244.08	95570.3	75878.2	87542.1	83861.8
1243.08	96273.4	78545.9	89069.8	83603.2
1242.08	95884.8	76753.5	87760.3	84058.9
1241.08	95421.4	77745.7	88229.4	84501.6
1240.08	97998.8	78810	87405	82962.8
1239.08	98137.9	78952.9	87524	85263
1238.08	96319.7	77945	88918.1	85105.3
1237.08	95785.4	77012.4	88122.4	83150.6
1236.08	95441.3	76624.3	88933.8	82395
1235.08	96621.1	77319.2	88189.2	84464.9
1234.08	96571.8	77500.5	86951.6	84005.6
1233.08	98634.9	80849.1	90210.1	84813.3
1232.08	101155	79656.2	91636.3	86152.1
1231.08	98935	81856.3	91171.9	87053.6
1230.08	100741	82866.5	93865.7	89195.6
1229.08	101734	86351.1	96617.3	89719.1
1228.08	105844	84799.7	97662.6	90949.2
1227.08	107674	85768.1	96209.8	93516.7
1226.08	104541	84971.5	96265.2	91788.3
1225.08	106785	84392.9	94937.6	91324.6
1224.08	106100	86044.3	97338.3	93119.1
1223.08	104024	82936.5	96253.3	90147.9
1222.08	103625	82962.4	94182	89439.7
1221.08	101458	80920.8	91616	88065
1220.08	98367.4	79047.7	88598	84767.7
1219.08	94891.6	74976.9	87109.1	83168.6
1218.08	92297.1	73188.1	83408	78064.3
1217.08	86786.9	69995.3	79586.6	75984.6
1216.08	84605.5	67940.8	77299.4	71994
1215.08	81630.5	64072.8	74134.8	69912.7
1214.08	75339.6	61140.3	72667.6	68487.3
1213.08	75040.4	62262.6	68695.1	65269.9
1212.08	73012	58756.3	65904.5	63553.2
1211.08	71495.9	57700	65342.3	62971
1210.08	69811.6	56410.3	64050.4	60654.2
1209.08	69740.6	55534.6	63521.1	59796.3
1208.08	69460.1	55450.6	62103.9	60067.4
1207.08	69562.3	56419.6	62868.8	59873.1
1206.08	68867.2	54180.4	61127.7	57591.3
1205.08	69439	53887.7	61193.3	59423
1204.08	66315.4	54902.3	60867.2	59133.7
1203.08	67377.1	53319.9	60957	57751.7
1202.08	68038	54861.6	61058.9	57531.6
1201.08	68177.9	53958.8	59892.6	57670.2
1200.08	66826	54378.2	61820.1	57898.7
1199.08	66265.5	55308.8	61191	60270.9
1198.08	66366.6	54056.5	60012.8	58528.7
1197.08	66356.1	53806.6	61614.7	59455.9
1196.08	67093.9	53423.5	60982.3	58862.8
1195.08	68058.4	53516.4	61058.2	59522.6
1194.08	67962.1	53543.5	61325	58971.9
1193.08	67542.2	52970.4	62195.9	58756.9
1192.08	68576.3	54045.4	60629	58718.3
1191.08	68366.7	54352.9	61973.5	57533.5
1190.08	67965.8	53975.6	64337.5	58882.5
1189.08	68878	54173.7	61903.7	60608
1188.08	68532.2	54444.2	62049.7	58609
1187.08	68653.6	55107.3	61957.2	59714.4
1186.08	68550.9	54586.3	61868.9	60979.3
1185.08	69085.8	54086.7	61917.7	59797.7
1184.08	69060	54464.8	61438	58634.3
1183.08	68117.1	53960.7	64702.1	59143.6
1182.08	67974.8	55445.3	63463.5	60174.9
1181.08	68557	55701.9	63270	60547
1180.08	69185.6	55884.8	61953.4	59625.7
1179.08	68948.1	54862.7	63901	59673
1178.08	69585.6	55074.5	62597.6	59713.6
1177.08	69915.9	55976.8	63912.5	59633.9
1176.08	68622.6	55079.5	64807.6	59881.7
1175.08	70106.7	54379.5	62841.5	61500.7
1174.08	70031.3	55900.6	63655.7	60214.1
1173.08	70306.3	55264	62239.8	61270.8
1172.08	70531.3	55907.9	65402.5	61210.3
1171.08	70269.9	55001.9	63214.6	61297.1
1170.08	69117.1	55163.3	65963.6	61007.9
1169.08	68391.6	55060.2	64406.2	61096.6
1168.08	71549.5	55322.4	64472.9	61183.8
1167.08	70879.5	56946	64807.5	61137.2
1166.08	69037.1	55662.4	64002.9	61705.9
1165.08	70330.5	55623.1	64265.9	61432.4
1164.08	70924.5	55424.7	63720.9	62992.5
1163.08	70555.3	56919.4	65340.6	61993.9
1162.08	71554.9	55618.9	66183.7	60992.6
1161.08	71574.4	56665.5	65034.2	61920.4
1160.08	70779.8	56649.4	63620	61919.7
1159.08	70953.7	56881	65697.6	61062.2
1158.08	71858.1	56790.8	66055.8	62038.5
1157.08	70493.6	55563.4	63639.5	62818.4
1156.08	72775.7	56885.5	65482.1	62746.7
1155.08	71350.7	57262.1	65602.7	62683.5
1154.08	71149.7	56336.9	63815.7	61454.8
1153.08	71555.9	57010.4	66690.2	62830.9
1152.08	73039.9	56750.6	64802.9	62406.1
1151.08	72678.1	58211.1	66756.9	62801.1
1150.08	72533.5	56952.2	64842	63681.2
1149.08	71652.8	57295.9	65371.6	63676.4
1148.08	73006.6	57650.8	66111.1	62295.5
1147.08	72363.6	57177.3	66718.2	64710
1146.08	73401.7	57605.3	66476.4	63996.2
1145.08	73187.9	58404.3	66760	64758.9
1144.08	72703.7	57973.5	68056.8	63828.3
1143.08	73920	58060.4	68135.9	64421.1
1142.08	74390	58404.8	66939.9	65632.6
1141.08	74003.9	58401.1	66504.7	64109.4
1140.08	72584.8	57944.1	67271.9	65286.6
1139.08	73910.5	58385.6	66555.8	63944.9
1138.08	74707.2	58335.4	68565.7	64840.7
1137.08	73763.4	59785	67108.9	64029.8
1136.08	75541.1	58212	68305.6	64235.1
1135.08	74341.4	57757.4	68793.9	64977.9
1134.08	75287.9	58878	68171	64861.2
1133.08	74666.7	58154.8	69544.8	65305.2
1132.08	74360.8	57981.6	69088.2	65767.6
1131.08	73680.5	59308.6	68180.1	64681
1130.08	73988.1	58937.3	68695.3	64853.5
1129.08	74498.4	57544.1	68077.6	65877.9
1128.08	75171.4	61077.7	67895.8	66385
1127.08	75389.4	59025.2	69148.1	66787.8
1126.08	75175.5	58359.6	68279.2	66118.6
1125.08	76050.8	59902.5	69110	65839.3
1124.08	75246.3	59927.7	67575.8	67542.4
1123.08	75239.3	58583.1	69445.7	66609.3
1122.08	73928.8	58881.2	67920	66402.6
1121.08	75213.1	59481.8	68786.4	66320.7
1120.08	74668.3	58693.4	70006.2	64925
1119.08	74827.4	59221.4	68162.9	64965.8
1118.08	75314.9	59776.7	68372	65704.7
1117.08	73290.5	57725.3	67525.3	65625.4
1116.08	75214.7	59170.9	68398.1	65955.5
1115.08	75350	59326.2	67568.3	66725.8
1114.08	75601.4	58946.4	68454.3	64063.4
1113.08	74443.2	60117.9	68496	65068.4
1112.08	76581.1	59619.9	69669	66526.3
1111.08	75742.9	59124.4	68843.5	66941.7
1110.08	75559.4	59447.7	69534	66931.4
1109.08	76545.5	60356.2	70080.6	67637.7
1108.08	76737.1	60541.3	70990.4	67391.5
1107.08	77777.6	60386.7	70593	66600.1
1106.08	76305.6	59835.2	69678.6	68029.2
1105.08	76577.4	60561.9	71825	66648.4
1104.08	77331.6	59135.5	71275.6	66772.5
1103.08	75062.1	59376.8	68561.5	64909.7
1102.08	75938.3	57684.1	68389.8	65784.1
1101.08	72597.9	57596.1	66858.3	64633.8
1100.08	74997.1	57769.6	68552.2	65647.4
1099.08	74694.7	57257.3	67443.4	65939.2
1098.08	74003.6	57495.6	67449	64552.1
1097.08	72334.1	57923.6	66184.1	62638.3
1096.08	71809.5	54829.1	64365.7	62387.9
1095.08	70033.5	55570.8	65102.1	60698.9
1094.08	70201.7	54134	63892	60747.8
1093.08	71814.6	54794.9	63997.5	62070.3
1092.08	71325.6	55069.6	65028.7	62260.1
1091.08	69961.9	55171.2	65009.4	61355.2
1090.08	70121.6	55362.6	64403	62551.5
1089.08	70901.9	54869.9	64614.5	60226.2
1088.08	71230.2	56175.3	64336.4	61302.1
1087.08	72279.7	56246.9	64361	61260.3
1086.08	72353.1	55924.1	64961.9	61782.5
1085.08	70236.4	53846.9	65081.7	62863.2
1084.08	70774.2	55505.3	66353.9	62709.7
1083.08	71974.3	54962.3	64646.5	62416.8
1082.08	71364.2	56050.8	64296.4	62437.7
1081.08	70631.2	55735.6	64937.4	61203.1
1080.08	70534	56453.3	65874.6	63600.3
1079.08	72051.4	56637.1	64666.2	62594.1
1078.08	71343.3	56155.4	64887.1	62219
1077.08	72920.4	56886.7	65946.9	62937
1076.08	71783.6	56193.3	66037.4	62716.2
1075.08	71690.6	56963.4	65178.6	62985.2
1074.08	71189.2	55711.1	66605.5	63348.4
1073.08	73600.4	56679.6	66151.8	62308.4
1072.08	75627.6	57095.8	66619.2	65038.5
1071.08	77301.7	58420.1	68932.7	64397.9
1070.08	74589.7	57813.7	67193.7	64910.6
1069.08	73617.9	56708.2	67035.8	63289.5
1068.08	72632.8	57160.8	65832.5	64090.2
1067.08	72196.3	56299.6	67215.1	65494.2
1066.08	73570.7	57689.9	67342.2	65298.9
1065.08	73827.1	56721.2	67024.6	63313.8
1064.08	73604	56858.6	68716.8	64535.2
1063.08	74193.7	58230.2	67316.9	63757.1
1062.08	73969	55619.8	67913.6	64605
1061.08	73364.3	57215.5	67623.4	65416.6
1060.08	76295	58358.7	68042.6	65981.5
1059.08	75337.4	58224.2	67617	65300.8
1058.08	75228.2	57297.6	68267.2	65085.7
1057.08	76492.1	58936.3	67790.2	65481
1056.08	74231.3	58125.6	66433.5	64819.8
1055.08	74848.3	58638.8	67639.4	64969.3
1054.08	74703.7	58579.6	68201.3	66305.6
1053.08	76696.4	58737.7	68670.6	66979.8
1052.08	74961	59010.5	69241.6	66382.6
1051.08	76536.3	59316.9	68857.6	67360.7
1050.08	77216.2	58864.2	69547.4	67122.1
1049.08	75210	59191.6	69415.6	67251.2
1048.08	76741.5	57952.4	69861.9	65895.9
1047.08	77167.8	59747.4	69866.3	67285.8
1046.08	77773.2	60262.1	70585.6	68612.6
1045.08	76488	60787.3	71965.7	66255
1044.08	77778.4	60870.5	69340	68773.2
1043.08	76753.2	60448.2	69982.3	68635.1
1042.08	78627.1	60389.8	70168.3	66888
1041.08	78007.4	60462.5	71003.5	67184.4
1040.08	78891.1	58249.6	72081.5	67898.2
1039.08	78565.5	59608.4	69264.2	67636.9
1038.08	76981	58823.8	71052	67930.1
1037.08	78317.7	60136.1	70593.5	68165.8
1036.08	77052.6	60133.8	70108.8	68669.3
1035.08	77185.9	59806.2	69526.4	69094.8
1034.08	77947	60064.2	69900	67969.9
1033.08	77391.8	59320.4	71362.9	67198.8
1032.08	79493.2	60078.8	70952.5	68036.9
1031.08	78412.5	60107.6	71399.7	69185.1
1030.08	79187	60269	70668.7	69001.3
1029.08	77199.3	62202.1	72486.5	68790.5
1028.08	79688.5	61252.5	71641.1	68536.7
1027.08	80371.4	61629.9	70165.3	67543.7
1026.08	78983.7	60853	72771.6	68188
1025.08	78777.3	60923	72461.2	70593.6
1024.08	80321.5	62572.3	74318.8	71683.1
1023.08	79996.7	62257.6	74227.6	71032.1
1022.08	82502.8	64563.7	75551.2	72267.6
1021.08	83269.7	63776.2	76751.5	71045
1020.08	80679.7	62426.4	74456.8	72354.8
1019.08	81680.8	62373	73247.5	72873.8
1018.08	82356.7	60764.3	73783.1	73209.4
1017.08	81968.1	62154.5	74185.7	73128.9
1016.08	82635.2	63317.4	73779.6	71604.4
1015.08	80746.7	63709.6	74902.1	71144.8
1014.08	80499.1	64053.1	75253.8	71059.5
1013.08	81069	62692.8	73712.9	70756.4
1012.08	81685.6	63947.8	73422.3	70159.6
1011.08	81431.9	62154.2	73348.3	71866.9
1010.08	80634.6	61936.2	73390.4	70285.9
1009.08	80292.5	63938.8	73820.6	70549.7
1008.08	81245.8	61556.9	73682.4	71114
1007.08	81899.4	62779.7	76101.5	71002.6
1006.08	83558.6	62514.6	75409.6	71969.8
1005.08	84248.6	64352.7	75555.8	74169
1004.08	85128.9	64930.5	76853.9	73811.3
1003.08	86023.7	65292.5	78110	74036.9
1002.08	87303.9	65560	78276.8	75532.3
1001.08	86813.8	67900.1	79593.3	77280.5
1000.08	89832.2	67392.4	79405.8	76336.5
999.08	89013.6	67202.7	79581.4	77443.6
998.08	89195.9	65847.4	79598.1	77634.1
997.08	87883.4	65737.1	78153.8	75643.6
996.08	86903.8	65937	79067.5	75358.5
995.08	85133.7	66144.2	76006.5	74918.9
994.08	83995.3	63629.5	76689.8	76134.2
993.08	83361	64054.1	75716.3	74100.2
992.08	83569.5	63012.3	74457.2	71162.4
991.08	82757.1	60934.6	75045.6	70332.4
990.08	79666.1	61465.3	72159.8	70391
989.08	79718.4	60710	72715.2	69921.8
988.08	80749.2	59768.1	72612	69156.8
987.08	78677.4	58216.8	71262.3	68598.5
986.08	80059.8	59258.5	71262	67370.2
985.08	78049	57953.6	71633.5	68938
984.08	79961.3	60459.1	71127.1	69528.3
983.08	78889	62660.5	73687.5	70587.7
982.08	81969.1	63467.8	74953.8	72821
981.08	87446.8	64757.6	76807.2	74709.5
980.08	88246.5	65778	79994.2	76407.6
979.08	90858.8	69828.3	80835.5	81269.5
978.08	93400.7	71485.4	84832	82033.1
977.08	95980.5	72502.1	84902.9	83887.2
976.08	96948.2	73410.6	85237.3	82823.5
975.08	95175.6	72046.6	85055.7	82418.8
974.08	91935.5	68777.3	83360	80362.3
973.08	89907.6	68163	79927.3	79407.3
972.08	88320.2	66091.7	80134.2	75669.7
971.08	84534.4	63259.4	76672.5	73594.4
970.08	82305.6	61270	71705.6	70923.3
969.08	77176.2	57292.1	70491.9	65771.5
968.08	72159.3	54648.9	65669.5	63288.5
967.08	67388.1	51230.3	63688.3	59011.1
966.08	66944.6	49958.4	59281.8	56704.9
965.08	64716.1	47416.4	58171.4	57516.8
964.08	62771.2	46395.1	58032.4	55941.2
963.08	62201.8	48559.8	58378	55556.4
962.08	61841.6	47534.4	57798.4	55486.2
961.08	61829	46426.5	55015.9	54449.4
960.08	59969.7	45590.1	55958.7	54014.3
959.08	61593.6	47490.9	56406	54330.1
958.08	62913.7	45633.1	57558.7	54066.3
957.08	61729.9	46715	56476.9	54154.4
956.08	60799.6	46586.8	57856.3	55130.6
955.08	61961.3	46200.1	55571.7	55647.7
954.08	60744.8	45760.4	56530.7	55234.7
953.08	60241.9	45960.6	57316.2	54802.4
952.08	62623.3	46395.8	55934.5	54108.2
951.08	62188.5	46820.9	55990.9	55163.3
950.08	62711.8	46524.7	56879.6	55803.3
949.08	61341.2	47411.4	56136.7	53249.4
948.08	62682	48150.1	57617.4	54937.8
947.08	63095.9	45634.3	57694	54374.1
946.08	61784.2	46844.9	57209.7	54369
945.08	62348.1	46251.5	57575.8	55254.3
944.08	61705.2	46853.5	57061.4	55736.1
943.08	62800.3	45887.8	57527.9	56171
942.08	61472.9	48549	57132.5	56282.4
941.08	64912.4	46158.4	57149.7	54969.8
940.08	63508.6	47418.4	58037.8	55423.4
939.08	62115.6	47273.9	57942.1	54607.4
938.08	62315.9	46759.6	57452.2	56665.6
937.08	61288.9	48217.9	57448.7	55944.5
936.08	62626.2	47109.3	57436.1	56046.5
935.08	62483	46745.5	57958.6	55864.5
934.08	63414.1	47329.5	57455.9	55707.2
933.08	62654.3	48421.6	57567.6	55118.6
932.08	63553.6	48271.4	58303.8	55402.7
931.08	63195.6	47381.8	58551.2	56358.7
930.08	63206.8	47966.7	57493.3	56546.9
929.08	63241.3	47226.6	58590.8	55347.3
928.08	63488.6	47234.7	58008.3	56471.6
927.08	63208.2	47046.4	58657.1	55922.3
926.08	65162.9	48616.4	58812.3	54509.1
925.08	64216.6	47290.1	59106.8	55959.8
924.08	64157.3	47906.6	57260.1	56544.8
923.08	63622.3	47602.3	59261.5	55684.8
922.08	64430.3	47799.6	59528.9	57626.7
921.08	65191	47087.3	58701.8	57658.8
920.08	63567.9	47855.2	59473.1	55786
919.08	64784.1	48042.6	59031.6	58069.2
918.08	65122.8	47041.2	59477.4	56808.8
917.08	65685.5	48422.4	58497.8	56632
916.08	64634.2	48178.2	59175.3	56417.1
915.08	64176.6	49096.5	59278.7	56553.3
914.08	65120.5	48550.1	59931.4	57567.3
913.08	66190.7	48259.5	61094.4	58641.4
912.08	64608.1	47251.4	59134.8	57092.5
911.08	66149.5	49409.2	60114.5	57630.3
910.08	64358.4	48906	60619.1	58610.6
909.08	64879.5	48172.2	60996.2	58593.4
908.08	65519.5	48088.9	60627.9	57328.4
907.08	64728.1	47741.2	60428.9	57785.6
906.08	65351	48492	60475.3	57114.2
905.08	66103.5	48751.5	61010.6	58347.4
904.08	65988	48555.2	60593.8	58990.2
903.08	66753.8	49142.3	61106	57752.7
902.08	65763.4	48000.2	61090.2	58804.5
901.08	65386	48770.6	60918.2	58965.8
900.08	66013.2	49071.5	62269.7	59132.5
899.08	63731	48997.8	60073.6	58538.9
898.08	66275.7	48880.3	61034.1	59566.7
897.08	65673.9	49835	59703.2	60629.3
896.08	67145.9	50142.9	60703	60301.3
895.08	66925.1	49231.1	60947	59484.9
894.08	67527.2	49710.7	62081.4	59896.4
893.08	66160.4	48342.4	61995.5	60263
892.08	68100.7	48871.3	62772.1	59467.9
891.08	68052.6	49726.7	61459.8	60383.8
890.08	67143.3	49075.5	60835.7	59939.9
889.08	67072.4	49898.9	62257.9	58924.5
888.08	66839.5	49792.7	61138.4	60004.6
887.08	67131.6	48749.3	62657.8	59302.6
886.08	67201.1	49995.3	63339.9	61020.6
885.08	68588.5	49573.1	63216.5	60862.1
884.08	67713.1	50543.5	61598.8	61531.4
883.08	68026.4	50219.2	62205.7	60146.3
882.08	68599	49570.4	62251.8	61244
881.08	68530.7	49694.1	62468.4	61961
880.08	67446.7	48868.5	62903.1	59814.3
879.08	68432.3	50568.6	63540.1	60275.8
878.08	69551	49218.8	62915	62077.6
877.08	68402.1	50251.7	62877.7	60981.7
876.08	70288.9	50479	62695.9	61660.5
875.08	68008.2	50199.8	63567.9	61198.8
874.08	69199.5	50529.7	64140.7	61190.3
873.08	68725	49830.2	63431.8	61055.5
872.08	68692.3	51025.3	63421.3	61297.3
871.08	68048.5	51906.7	64509.6	61878.1
870.08	69764.5	50154.4	64194.5	60890.4
869.08	69034	49632.7	63611.6	61459
868.08	70058.4	50775.7	63685.3	61287.3
867.08	68573.6	50672.9	64527.9	60917.6
866.08	70019.1	50797.6	63889.1	61631.1
865.08	70009	50386.9	64638	61636.2
864.08	69993.3	50892.1	63773.7	61303.8
863.08	70010.7	50885.2	63812.7	63191.4
862.08	70456.5	51462.3	63895.1	63102.6
861.08	69906.7	50260.9	65061.4	62686.6
860.08	69727.1	52430.7	64810.4	61899
859.08	69412.8	50137.1	64482.1	63730.1
858.08	70012.1	50512	65945.8	62405.2
857.08	70673.8	51237.1	64358.1	62732.7
856.08	70449.8	50261	64558	62180.5
855.08	69407.6	52108.9	64482	62680.5
854.08	70677	52114.7	64876.1	62863
853.08	72291.8	52318	65706.8	64311.7
852.08	69604.9	52233.8	65918	62191.4
851.08	71219	50856.5	64466.1	63390.6
850.08	71430.7	50936.1	66109.4	63561.7
849.08	72679.8	50342.9	66213.5	62333.6
848.08	71288.3	51372.6	66206.6	64063.5
847.08	71365.7	52082.3	65101.3	64305.7
846.08	71482.9	51840	65841.2	65911.5
845.08	72363.1	50363.1	65894.4	62318.8
844.08	72646.9	52349.3	66089	64250.8
843.08	71215.7	51679.8	66678.3	63393.9
842.08	70506.7	53782.9	66366.5	64033.3
841.08	71537.7	52088.3	66382.8	65106.4
840.08	72113.5	52387	66419.5	64004.9
839.08	72403.2	52107.3	64973.1	64128.2
838.08	71521.2	51647.8	66969	64680.6
837.08	73685.2	52551.4	65695	64405
836.08	71757.1	51918.3	66299.8	63487.6
835.08	72559.3	52062.7	67837.2	64289.6
834.08	72323.3	52182.1	67513.6	64368.8
833.08	72586.5	52914.9	65775.4	63888.3
832.08	71918.4	52442.8	64787.4	65388.4
831.08	72304.9	52624.4	68283.6	63879.1
830.08	72643.2	53452.6	66405.8	65590.4
829.08	73289.7	52226	67219.3	65618.9
828.08	74408.6	52828.6	66997.5	65524.3
827.08	72938.4	52591.6	67620.4	65225.7
826.08	73291.5	51740.1	66962.2	66877.2
825.08	73286.4	52496.1	68048.5	66990.8
824.08	73628	52576.2	68744.3	66944.5
823.08	74044.1	52254.5	68225.7	65898.7
822.08	73205.7	53420.7	67292.1	63958.7
821.08	75314	52449.5	66931.9	65036.3
820.08	74386.1	53457.7	68181.4	66967.9
819.08	74820.5	52704.7	68353.7	66575.4
818.08	73839	52956.6	68587.8	65502
817.08	74887.7	53664.6	67788.3	64036.2
816.08	73960.5	53848	68083.9	66400
815.08	74538.1	52935.1	68110.8	66992.5
814.08	74043.4	52555.9	68202.2	65749.5
813.08	75138.9	54272.7	69131.8	67179
812.08	74220.4	54240.3	69398.1	65099.8
811.08	75211.9	54057.3	69340.6	67394.6
810.08	75406.4	53195.5	69389	67539.4
809.08	74993.2	54177	68282.5	68497.4
808.08	76595.2	53940.4	69144.5	66881.9
807.08	76286.4	54577.1	69719.4	67412.2
806.08	76651.6	52859.1	69879.8	66829.9
805.08	75435.5	53484.1	70250	66574.3
804.08	73744.6	55161	70931.4	67381.2
803.08	74468.8	53343.6	70079	68017.5
802.08	77091.5	53462.2	70164.8	67254
801.08	75758.4	54928.7	69704	68666.1
800.08	75062.5	53897.7	70958.1	66666.7
799.08	75361.3	55975.8	70418	67268.9
798.08	73564.1	54228.4	71428.3	67400.1
797.08	76350.3	53425.4	70289.8	67540.7
796.08	78100.2	53941.3	70297.3	67104.5
795.08	76550.5	53670.2	71363.9	68161.9
794.08	75770.1	54274.7	70166.4	66332.1
793.08	77019.3	56104.8	70757.6	67969
792.08	77463.4	54302.7	70713.1	68681.6
791.08	77565.4	54378.6	69059.9	67860
790.08	77306.3	54137.5	70155.1	69560.1
789.08	75784.1	56066.2	72643	68268.1
788.08	77442.7	54286.7	71796.4	68492
787.08	76218.2	55365.1	70217.5	69445.9
786.08	77465.2	55683.5	70936.8	68251.1
785.08	77325.1	54033.4	71941.7	68334
784.08	76942.5	55349	71815.1	71013
783.08	78013	55083.6	72548.3	68707.2
782.08	77910	54953.3	70770.8	69274.4
781.08	77126.7	55063.8	72356	68184
780.08	76332.6	55422.6	72356.9	69860
779.08	78056.5	56109.6	72124.9	69731.4
778.08	77449.2	56588.3	71940.3	69075.9
777.08	78305.4	56057.5	73729.3	70028.7
776.08	77816.8	53981.7	73729.3	69630
775.08	80004.5	55578.8	73631.1	70406.9
774.08	79865.6	55155.9	73908.4	70318.8
773.08	77437.4	55317.9	72451.5	70320.7
772.08	77952.9	54703.8	72355.3	70131.3
771.08	78212.3	55825.6	72891	70520.9
770.08	77803.8	56019.9	73811.3	70098.8
769.08	79091.4	56674.3	73747	70829.5
768.08	78868.3	56420	74657.3	71216.6
767.08	78209	55206.7	74916.6	70688.6
766.08	79298.7	56594.8	73838.5	70349
765.08	78721.8	56852.6	74007.9	69626.5
764.08	80204.3	55583.3	73390.8	70803.7
763.08	80298.8	56312.8	73372.2	72005.8
762.08	80359.6	56500.3	72667.9	71859.4
761.08	78740.5	56291.1	73656.7	71517.9
760.08	78113	55769.6	74982.3	71667
759.08	79554.8	55467.7	73468	71146.5
758.08	79332.4	56112.2	73929.3	71131.7
757.08	79868.2	56292.6	75055.4	72046.1
756.08	79695	56210	74613.8	71940.9
755.08	81261.3	54827.6	74546.8	71833.3
754.08	78915	56800.4	74133.7	74025.8
753.08	80949.2	55793	74307.9	71646.4
752.08	81371.5	55716.5	73259.6	71952.4
751.08	79268.3	56334.7	74913.8	72390.2
750.08	79479.3	57860	73580.5	72176.2
749.08	82265.4	55750.2	74100.6	72893.2
748.08	81156.9	57058.8	74744.7	72916.9
747.08	81073.7	56374.5	76095.4	73176.4
746.08	80459.2	56534	75892.9	72038.8
745.08	81533.3	55729.1	75378.8	72553.7
744.08	81523.9	57632.9	75481.5	73310.1
743.08	80715.4	57033	74864	73021.6
742.08	81951.2	56027.1	75904.1	73160.9
741.08	81701.5	55883.1	76296.4	74301.3
740.08	81417.6	56513.8	74989.1	73412.7
739.08	83344.6	58282.6	77828.1	73747.1
738.08	81095.1	57818.5	75506.4	72707.6
737.08	80557.7	57123.7	76478.7	73743
736.08	81798.5	57740	76372.2	74853
735.08	81664.5	56037.9	76084.8	74906.7
734.08	83025.4	57393	77135.7	73984.3
733.08	84180.5	56607.2	75580.2	73875.6
732.08	81938.7	57153.4	78431.9	74695.3
731.08	83540.7	56825.5	75978.6	73529.8
730.08	82299.6	57472.7	77483.4	73914.7
729.08	83556.5	57373.1	77028.3	75732.5
728.08	83176.3	58367.1	76118.9	72276.3
727.08	83868.1	58664.8	78042.6	75700.4
726.08	82645.9	58814.9	76976.1	75443.3
725.08	84783	56019.9	77034.2	74321.7
724.08	83191.4	58054.9	78506.5	74210.1
723.08	84337.1	57780	77365.2	75052.9
722.08	83541.8	57382.4	79427.2	75864.7
721.08	84301.4	58362.3	78168.3	75566.3
720.08	84355.7	57679.3	78216.8	74994.9
719.08	84342.4	58077.4	78497.2	76079.8
718.08	81795.9	59230.3	78742.3	76464.5
717.08	84077.4	57520.7	76646	76133
716.08	84740.2	58646.1	79885.5	75995.5
715.08	82978	58223.9	77560.5	77378.7
714.08	85594.7	57505.2	79659.7	75367.8
713.08	85430	57971	78565.7	76927.5
712.08	84884.8	58652.7	79129.1	76006.9
711.08	84606.4	57978.9	79103	76496.8
710.08	85748.8	58238.1	78799.7	75493
709.08	84148.7	57810.5	78920.7	77299
708.08	84779.4	59798.4	79143.8	76694.8
707.08	84594.4	58858.3	78694.8	78065
706.08	84899.4	58478.7	79266.1	78668.4
705.08	85325.7	58485.4	80059.1	76347
704.08	84573.2	57552.8	77886.7	76901.8
703.08	86507.7	57676.1	80983.9	78184.1
702.08	85159	58284.8	78737.8	77566.7
701.08	85505.2	59762.4	80686.8	77919.5
700.08	87243.1	60374.4	80704.9	77016.5
699.08	85938	58545.5	80048.6	76823
698.08	85513	59598.7	78240.5	78287.6
697.08	85724.2	59446	79050.8	77183.1
696.08	87447.5	60174.5	79989	76673.9
695.08	85721.2	58117.1	79755.5	76819.4
694.08	85947	58599.9	81383.2	78505.4
693.08	87145.5	60177.2	79839.2	78100.6
692.08	87343.6	59828.8	80922.4	77984
691.08	88192	59038.1	81516.5	78973.6
690.08	86276.7	59541.6	81462	78112.4
689.08	87498.9	59976.4	80756.1	78591.3
688.08	87605.7	59687.4	81790.3	79797.2
687.08	87694.7	59345.5	81893.2	80900.3
686.08	88268.8	60583.6	80857.2	78588.2
685.08	86486.2	60406	82425.5	79301.5
684.08	86739.5	60085.1	81806.1	79409.6
683.08	87465.9	60750.7	81030.2	78157.6
682.08	88204.4	60333.3	81906.7	79481.3
681.08	87375.7	60278.5	82305.9	79742.8
680.08	87495.9	60125.3	82316.7	78585.4
679.08	88053	59692.9	81958.6	79240.3
678.08	87207.8	60508.4	80447.5	79368.4
677.08	86198.1	60703.9	80906.2	79543.8
676.08	89872.7	60325.7	81518.9	78669.9
675.08	89945.2	60804.1	83016.7	79066.2
674.08	89040.1	59874.5	84424.6	80756.3
673.08	88031.4	59294.8	83526.4	78300.1
672.08	88053.9	60547.6	84229.3	79873.1
671.08	87564.7	60606.8	82907.7	80388.9
670.08	88884.6	59968.8	85005.1	80175.5
669.08	89819.2	60704.3	83161.2	80983.4
668.08	90124.4	60872.7	82541.7	82353.7
667.08	89852.5	60465.2	82025.3	80986.8
666.08	89419.9	61861.1	83359.5	81646
665.08	91211.4	60042.7	82636	80854.8
664.08	89344.9	60176.7	84099.5	80716.5
663.08	90512.9	61478.2	83962.3	80756.5
662.08	90363.7	59399.1	84044.1	80316
661.08	90512.3	61297.3	83410.4	81889.9
660.08	91130	61138.9	85647.6	81922
659.08	90726.6	62198.8	84039.1	80905.9
658.08	88462	61646.6	84021	81656.4
657.08	89520.4	61459.4	83770	80823.7
656.08	90437.6	60178.7	83798.8	79806.9
655.08	91183.8	59732	84627.3	81340.5
654.08	91251.3	62514.8	84488.6	81668.5
653.08	91518	61845.5	86720.9	81766.3
652.08	91634.2	61204	84622.1	82351.6
651.08	91507.2	62057.8	87063.2	82940.6
650.08	91478.7	60849.6	85259.1	82757
649.08	92147.7	61794.6	84274.8	82681.6
648.08	92110.7	62275.5	83706.9	81344.1
647.08	91227.8	63061.2	85091.6	82680
646.08	92078.3	61105.4	85642.7	82724.3
645.08	91925.8	61291.7	84879.9	81726
644.08	92304.3	61092.9	85389.7	83140.9
643.08	91453	61122.3	85417.4	81815.8
642.08	92645.7	61377.4	86125	83265
641.08	90946.7	62309	84235.8	83270.1
640.08	92062.5	61307.4	86303	82683.5
639.08	92906.5	61283	84172.3	84996.4
638.08	92628.8	61533.2	85909	82007.2
637.08	90460.5	62689.6	85335.3	83213.8
636.08	92368.9	61638.2	86279.6	83132.8
635.08	94868.1	62018.8	86523.6	84304.8
634.08	93770.3	61212.6	86540.1	84057.3
633.08	93104.2	63287.4	87156.4	83585.7
632.08	94000.7	63524	85882.7	84767.9
631.08	92239.6	62697.5	85677.7	84520.1
630.08	92763.2	62883.6	86148.9	84802
629.08	93767	62238.8	85622	85339
628.08	92080.5	62705.4	85953.3	84984.7
627.08	92434.7	62015.1	86834.2	84069
626.08	93134	62051.2	86446.5	84487.5
625.08	94095.2	61542.8	85794.9	83821.3
624.08	93072	62766.5	87749.3	83877.1
623.08	93728.8	62749.6	87885.9	83102.7
622.08	95880.4	64553.1	88692.6	83186.2
621.08	92269.2	62908.2	87899.4	85475.9
620.08	95737.6	62332.8	87648.7	85747.5
619.08	94772.2	63653.3	87893.3	85820.9
618.08	95766.3	63263.1	88046	86182.6
617.08	93531.8	62374.3	87224.6	85898.9
616.08	93443.7	62374.4	87917	85121.6
615.08	92675.8	62868.7	88599.6	84436
614.08	95290.3	63467.7	88567.3	85620
613.08	94576.5	63593.8	85982.5	86283.8
612.08	93720	63655.7	88700.5	85831.4
611.08	93576.4	63999.6	88897.6	86284.9
610.08	97206.8	63411.3	88678.3	83983.9
609.08	95462.3	62685	89088.1	86021.8
608.08	94434.1	64036.6	89307	86099.1
607.08	94039.5	62623	88832.7	86425.3
606.08	95090.9	64649	88539.6	86316.3
605.08	96069.1	62976.7	89539.9	86275.2
604.08	96926.1	64667.8	89086.2	86641.2
603.08	95600.8	64347.5	89322.8	87296.4
602.08	95463.1	63390.4	91417.2	88566.3
601.08	95397.5	64406.8	90129	88102.4
600.08	95193.8	64794.6	90041.4	86425.3
599.08	94071.7	64740.2	89173.7	87467.2
598.08	95558.6	65168.2	90843.5	85127.3
597.08	95885.6	63960.6	91042.8	85702.9
596.08	96829.6	64240.7	88419.5	86164.1
595.08	95915.2	63063.8	90462.5	85413.9
594.08	97618.7	64287.1	89384	87302.8
593.08	97106.5	64184.3	90851.2	86639.3
592.08	98145.8	64749	90013	87775.1
591.08	98762.9	64436.5	88691.7	86069.4
590.08	97294.4	65125.6	90578.2	86598.1
589.08	98538.1	64211.1	91278.7	87424.7
588.08	97729.5	64577	90286.5	87538.8
587.08	98108.7	64227.9	89964.2	86588
586.08	99203.9	65140	90120.6	87409.7
585.08	98218.4	64897.8	91846.1	87376.6
584.08	97629.8	65374.8	91483.4	88203.4
583.08	97384.6	64785.1	90903.4	87746
582.08	99299.1	65673.2	91267	88164.3
581.08	98976.8	64548.3	91615	89506.3
580.08	98374.9	64334.9	91785.6	86402.9
579.08	99042.5	65170.6	91907.4	88369.9
578.08	97843.1	64751.4	91453	87864.9
577.08	99551.8	65411.1	91840.7	89175.5
576.08	99952.2	65378.7	90199.7	88014.8
575.08	97145	64416.7	90421	88075.8
574.08	99633.5	65079.3	90663.5	86827.1
573.08	98406.1	66141.3	91372.5	87303.6
572.08	96761.1	65586.3	89234	87267
571.08	99572.9	66235	90857	88100.6
570.08	97876.8	65308.2	90031.8	87401
569.08	98039.6	63524.1	90392.6	85717.9
568.08	98983.3	63748.1	90011.1	88239.8
567.08	96266.9	63544.6	89638	87400.8
566.08	96525.8	63854.9	90381.1	88085.9
565.08	97936.4	64674.7	89260.9	87316.9
564.08	97159.2	63651.4	89918.6	87141.2
563.08	99247.8	64978.9	91201.1	89915.7
562.08	97453.6	65440.5	91342.7	88764.6
561.08	100327	64772.9	93795.7	90392
560.08	101476	64665.7	93510.6	90493
559.08	102805	67354.4	92762.6	90965
558.08	104553	66108.3	93645	93304
557.08	104540	67157.2	96427.7	92167.6
556.08	105864	68376.2	96667.4	90875
555.08	104363	69375.3	96886.5	94537.4
554.08	103318	67473.7	95672.1	92091.4
553.08	105154	67449	94611.5	93009.9
552.08	99953.1	66367.4	93970.7	90604.3
551.08	101991	65751	92513.6	89593.4
550.08	98909.3	64830.3	91620.4	88385.6
549.08	95763.6	62005.6	88291.4	85308.8
548.08	95917.5	62303.2	88445.3	85777.3
547.08	95105.7	63119	88929.7	85833
546.08	94951	62952.2	88277	85646.1
545.08	91101	59650.1	84195.2	82979.6
544.08	87069.5	57690.7	80877.4	79513.6
543.08	84193.7	56058.2	79886.1	78271.5
542.08	83564.4	55627.5	78446.1	77197.9
541.08	81805.1	53955.1	77689.2	74591
540.08	82234.3	52048.5	77164.2	75589.6
539.08	83308.3	55176.5	79968.1	75243
538.08	86939.4	57800.9	80735	80388.9
537.08	85573.3	55248.1	81502.6	78613
536.08	80468.1	52304.1	75055	72647.8
535.08	82810	54066.5	77630.4	75521.8
534.08	102473	69833.6	94414.1	93838.5
533.08	166870	108606	140522	134699
532.08	247728	164842	219447	220889
531.08	274948	179062	251282	246061
530.08	153635	92927.6	142093	136845
529.08	86244.1	54502.3	80098.7	78018.3
528.08	73564.5	47887.8	67496.9	66897.8
527.08	70170.4	46050.5	67502.8	66246.6
526.08	69972.2	47214.4	65860	63644
525.08	68947.5	45975.5	65873.6	63091.5
524.08	68419.7	44984.4	64886.1	63673
523.08	67939.6	44229.8	66338.5	62976.4
522.08	67240.6	45832.3	62913.3	60695.5
521.08	68391.3	45238.3	64532.1	64118.3
520.08	68188.7	45734.9	64504.6	63195.9
519.08	68382.7	44101.5	63768.9	62296
518.08	67094.4	44993.6	64280.7	63416.8
517.08	66755.7	45578.5	63855.4	63489.2
516.08	68306.9	44778.3	62269.6	62040.5
515.08	67660.3	45293.9	65382	62673.4
514.08	67615.1	44845.8	63005.4	62489.8
513.08	66282	44916.1	64741.3	64500.5
512.08	68110.9	43812.1	64282.6	62427.6
511.08	68520.5	44648.5	65340.8	63380.8
510.08	67444.7	44988.5	64750.7	62699.9
509.08	67895.7	44546.5	65249.3	61808.4
508.08	70157	45155.5	66054.4	64213.4
507.08	68037	45213.4	65472.1	63388
506.08	68594.2	44344	65019.2	62515.5
505.08	67795.1	45032	66024.6	65019.3
504.08	67534.5	44603.7	64375.9	63782.5
503.08	69449.8	44842.3	65369.7	63116.1
502.08	68977.8	44152.3	64796.6	65831.5
501.08	68800.6	45492.1	66043.9	64521.6
500.08	68655.8	45144.5	65735.2	62766.6
499.08	70134.9	44423.8	65875.2	65318.8
498.08	70210.2	45471.2	65345	64711.8
497.08	69835.9	46332.8	67252	66016
496.08	70809.1	46241.2	66483.9	65000.2
495.08	70122.7	45822.1	65297.3	63427.2
494.08	69095.3	44902.2	65358.1	65084.4
493.08	68370.9	44365.9	63657.1	63879.3
492.08	69114.1	45040.8	64871.1	64339.4
491.08	69699.7	45220.5	65636.8	63536.5
490.08	68654.2	44598.4	64727.7	63810.1
489.08	68173.4	45413.1	65123.5	63921.2
488.08	69479.6	45187.2	65841.4	64558.4
487.08	69131.4	44295.3	65706.4	64834.5
486.08	68949.3	45035	65861.3	63888.9
485.08	67596.5	45249.6	64872.4	63769.3
484.08	69128	46324.3	65567.6	62966.4
483.08	67808.7	45699.8	66451.2	64174.8
482.08	68538.7	45513.9	66788.2	64008.9
481.08	69386.4	45215.6	66070.7	64634.2
480.08	69504.2	45620.3	66493.8	65467.6
479.08	69932.1	45754.7	67063.7	64023.7
478.08	68904	45316.7	66334.8	65802.9
477.08	69034.4	45060.6	66574.8	66058.6
476.08	67906.1	44853.5	66021.2	64414.6
475.08	69775.3	45321.3	65662.9	65772
474.08	67961.7	45855.6	64795.4	64765.3
473.08	68614.8	44657	66487.1	65057.6
472.08	68751.9	46503.2	66721.8	65949.6
471.08	68811.8	45952.7	66247	65122.4
470.08	70289.2	45010.9	64746.4	64829
469.08	68518.3	45245.7	65783.9	65045.7
468.08	68580.1	44590.6	65843.3	65526.8
467.08	69445.5	45266.7	67032.6	66056.4
466.08	70659.6	45697	66133.4	67090.4
465.08	68922.3	46001.5	68247.6	66431
464.08	70786	45668	67676.2	66409.3
463.08	69110	45450.6	68486.3	66417.8
462.08	68355.2	45300.1	67422	64653.5
461.08	69844.5	44864	66510.4	64232
460.08	70177	46126.7	66240.6	65978.6
459.08	69239	45273.1	67156.9	65550.8
458.08	70973.9	45393.6	66631.3	67507.7
457.08	71032	46490.2	66963.6	64358.1
456.08	69497.3	45595.8	68239.7	66195.3
455.08	69777.5	44822.1	67991	66079.1
454.08	70208.2	45423.1	67709.8	65623
453.08	69360.9	44760.7	67453.6	66043.4
452.08	70798.9	45077.1	67985.4	65949.1
451.08	68079.6	46121.7	67662.7	66363.6
450.08	69960.2	45397.9	66768.1	67451.6
449.08	70655.8	45971.2	68019.4	66759.2
448.08	70160.3	45400.9	67760.9	66628.9
447.08	69360	46736.1	67699.2	66856.6
446.08	71134.3	46318.7	67372.4	66425.4
445.08	69639.8	46770	67143.2	66346.2
444.08	70574.3	45630.6	68252.3	65555.4
443.08	72231.1	45966.8	67313.5	66693.3
442.08	70942.5	46956.7	68554.4	66239.7
441.08	71073.1	46528.3	67529	66175.6
440.08	71351.6	46753	67561.4	67565.8
439.08	72349.4	46292.5	67770.7	65887.6
438.08	70519.8	46241.5	68808.3	66417.8
437.08	69718.2	46317.2	68145.9	66590.3
436.08	71460	46265.6	68807	66933.2
435.08	71675	46388.1	66828	65387.6
434.08	70561.1	46090.8	67343.3	67050.8
433.08	71765	44615.1	67268.6	66315.2
432.08	70663.9	45908.8	68558.4	66959.9
431.08	71020.4	45261.8	68873.6	65624.7
430.08	71443.3	46129.9	68686.9	66647.5
429.08	70023.3	46567.3	69606.1	67579.2
428.08	71960.5	46373.7	69036.6	66649.8
427.08	71730.9	46700.4	69586.5	66087
426.08	72050.1	46660.5	69539.5	68027
425.08	73162.8	46930	70015.4	68279.8
424.08	72410.1	47590.1	70835.8	69109.2
423.08	73391	47232.8	71105.5	69309
422.08	72410.6	45770.2	69763.3	68496.2
421.08	71268.1	47227.8	69350.7	68732.3
420.08	70043.1	46158.7	68322.4	69361.6
419.08	71518.4	46947	66754.3	65697.4
418.08	68282.6	45046	67266.2	65243.5
417.08	68935.7	44861.1	66239	65219.2
416.08	68351.7	44819	66055.9	63810
415.08	69112.7	43199.3	65651.6	63386.8
414.08	66377.1	43256	63496.6	62801.5
413.08	65280.9	41976.8	62649.5	62724.5
412.08	63826.4	41660.4	61826.8	61745.1
411.08	62210.7	40354.2	61374.3	59069.2
410.08	62397	40200.9	59991.6	59182.3
409.08	63731.9	39891.4	60874.6	60189.4
408.08	63762.1	40337	60911.3	60838.3
407.08	64183.1	40871.3	61466.2	59117.1
406.08	63665.8	39653.1	60429.3	58760.8
405.08	59781	38334.2	58035	58849
404.08	60467.8	37885.2	56654.7	57258.3
403.08	63122.5	40664.7	59214.9	60273.3
402.08	71315.9	46304.2	68637.1	67317.8
401.08	110283	74155.7	109030	112111
400.08	176631	116967	169954	167205
399.08	126208	78264.6	118736	116680
398.08	71224.2	45932.5	67988.4	66144.2
397.08	60568.8	39111.9	57624.4	56584.1
396.08	58990.9	38634	56015.8	54582.5
395.08	56784.5	37483	55220.4	54580.7
394.08	59601.6	37405.3	55165.6	55397.4
393.08	57550.1	36743.7	54668.1	53928.4
392.08	56833.3	37696.3	56163.9	53258.5
391.08	58039.7	36584.6	54022.3	54660
390.08	56461.9	36769.8	54742.7	53348.1
389.08	57208.1	36792.6	54844.6	54166.2
388.08	56889.5	37792.5	54697.7	53411.5
387.08	56346.6	35902.7	54314.3	55350.1
386.08	56982.8	37571.9	55240.3	54695.8
385.08	57574.9	36311.3	55542.6	55355.2
384.08	56766.8	37258.4	56358.4	55026.5
383.08	57264.3	37842.3	55440.3	54267.4
382.08	57024	36658.3	56399.9	54804.7
381.08	59275.6	38755.5	55839.9	55008.9
380.08	57894.9	37182.4	56458.8	54089.3
379.08	58052.6	37069.2	55164.6	53664.9
378.08	58448.4	37566	55161.7	53793.9
377.08	59362.6	38690.5	55899.2	54399.7
376.08	59365.3	37750.9	56505	54494.9
375.08	59045.6	37690.3	55721.1	55637.1
374.08	58467.3	37241	57195	55322.4
373.08	58688	38191.5	57612.9	54135.2
372.08	59298.2	37292.3	56104.1	55157
371.08	59851.8	37491.8	57700.7	56379.3
370.08	59204.6	39630	56209	56316.7
369.08	58553.1	38548.4	57596.7	55629.1
368.08	59059.7	37682	56541.5	54414.6
367.08	59570.4	39148.1	57933.3	55358.1
366.08	59865.3	38590.4	56438.8	54814.5
365.08	59165.4	38353.8	57025.3	55997.3
364.08	60186.1	37596.6	57996.5	55597.5
363.08	60263.5	38445.8	56561.1	54796.8
362.08	59582.1	38025.7	57194.9	55069.9
361.08	59318.7	39648	56766.6	54064.1
360.08	60489.4	39192.7	57036.9	55062.1
359.08	59665.9	37589.8	58030.9	55482.2
358.08	59874.8	38363.6	58338.4	55797.6
357.08	59086.9	37915.6	55647.8	55682.6
356.08	60613.2	38459.4	57858.1	55766
355.08	60142.7	39020.5	58178.8	55623.3
354.08	61239.1	38926.1	59431.7	55504.2
353.08	59934.5	38784	58007.9	56795.6
352.08	61075.1	39264	58687.9	58241.2
351.08	60977.6	39941.3	59210	58356.6
350.08	60855.5	39850.3	57875.6	56099.3
349.08	59861.5	40299.5	57361.5	57637.1
348.08	61426.8	40629.3	58219.2	58333.7
347.08	62549.2	40019.5	59528.4	59231.9
346.08	61707	39280.7	58029.2	58364.9
345.08	60317.1	40224.2	58472.9	58061.2
344.08	61795.1	39377.4	58440.6	57425.8
343.08	61887	39131.7	59790.2	56127.8
342.08	62573.6	39332.9	59349.1	56479.7
341.08	62800.3	40078.4	58937.8	58588.2
340.08	62133.9	39845.2	58633.7	57595.8
339.08	62440.5	40428.8	59119.3	58435.5
338.08	62015	39687.6	59030.1	56834.5
337.08	62416.5	41687.2	59106.7	59269.5
336.08	63269.5	39964.9	60759.8	58604.4
335.08	63238.3	40563.7	61937	58611.5
334.08	62699.2	40093.2	59183	58118.5
333.08	61321.2	41243.7	59572.4	58063.4
332.08	62945.3	40511.5	60414.9	58433.7
331.08	61781.8	39107.2	59843.8	57722.6
330.08	61627.5	40320.5	59602.1	58266.4
329.08	61402.6	40501.9	60130.4	57574.5
328.08	62400.7	39428.4	59398.2	59448.4
327.08	61940.9	40095.9	58532.7	57269.5
326.08	62089.5	39420.2	61312.2	57852.6
325.08	61645.1	40934.2	60481.6	57956.4
324.08	63475.1	40026.5	59386.5	57809.9
323.08	62892.5	39210.3	59663.5	58557.4
322.08	62179.6	39715.4	60032.7	57619.4
321.08	62098.1	40175	60219.1	57660.1
320.08	62684.2	40613.4	61257.7	59496.5
319.08	63834.8	41598.7	60917.2	59025.7
318.08	64942.6	41245.1	59978.2	59875.8
317.08	65495.3	41676.9	61473.8	60115.7
316.08	66629.3	42324.5	62555.1	61486.1
315.08	66684.1	43221.1	63639.9	63804.1
314.08	66683.2	42979.7	63687.4	62989.9
313.08	67383	45064.5	65481.3	62666.3
312.08	70320.8	45323.3	66590.4	63787.6
311.08	69555.1	44070	64473.3	63726.7
310.08	69497.5	44609.6	66059.7	64154.9
309.08	68821.5	43341.2	65510.8	62760.5
308.08	69682.5	43361.8	65063.8	62088.7
307.08	68834.3	41223.5	62915.1	60919.1
306.08	66321.3	42075	61888.4	61031.7
305.08	62697.7	40262.4	60460.1	57693.5
304.08	59441.2	37987.8	57172.4	54224.1
303.08	57028.7	37236.6	53548.4	51622.5
302.08	52218.6	33294	48889.4	48908.6
301.08	48385.7	31774.3	46342.2	44197.9
300.08	44801.7	28721.7	42590.7	41817.5
299.08	41744.8	26898.2	39337.4	39337.1
298.08	38458.2	24348.8	36889.7	35243.8
297.08	37394	22422.6	33509.7	33461.4
296.08	34186.5	20880.9	32317.8	32494.4
295.08	32163.6	21099.8	31432.7	29928.8
294.08	32278.8	20387.8	30897.3	30324.6
293.08	32699.7	20959.5	32444.4	30866.1
292.08	34247.3	22090	33683.1	33296.9
291.08	33307	21618.5	32630.8	31968.5
290.08	33026.6	21746.5	33847.1	32708.5
289.08	59827.8	39332.2	60350	61650.9
288.08	116349	76346.5	110857	110369
287.08	163626	105423	153312	156062
286.08	306262	199617	286222	287876
285.08	351665	228570	325485	313935
284.08	173068	108132	161435	145084
283.08	42472.9	25433.8	39504.6	34935.2
282.08	17021.1	9839.52	14998.2	14856.5
281.08	11511.1	7020.77	10185.7	10267.3
280.08	9208.81	5706.23	8927.58	8443.3
279.08	8044.23	4707.09	7876.84	7203.08
278.08	6884.12	4177.15	6937.32	6381.7
277.08	6064.51	3554.32	5991.48	6587.66
276.08	6076.43	3578.5	5616.96	6370.61
275.08	6378.78	3661.5	5864.15	5866.19
274.08	6060.74	3622.32	5920.98	6030.05
273.08	6205.67	3429.69	5958.74	5508.27
272.08	6355.39	3376.58	5657.95	5580.77
271.08	5930.24	3857.95	6679.96	5845.88
270.08	6298.87	3451.34	6462.36	6050.96
269.08	7023.65	4220.51	6598.06	5738.48
268.08	7039.94	3800.14	5903.13	5931.11
267.08	6315.79	3717.45	6290.42	6300.13
266.08	5846.19	3312.24	5547.96	5357.58
265.08	6139.15	3718.79	5817.93	5660.69
264.08	6025.92	3534.63	5526.26	5513.59
263.08	5252.46	3505.15	5475.94	5521.04
262.08	5613.59	3615.74	5442.34	5636.85
261.08	5841.74	3390.54	5458.11	5376.3
260.08	5619.75	3416.81	5419.48	5198.86
259.08	5820.53	3455.91	5051.03	5316.68
258.08	5085.25	3534.32	5338.38	5256.86
257.08	5622.81	3267.99	5707.68	5355.96
256.08	5463.06	3452.4	5496.7	5327.01
255.08	5201.23	3070.82	5159.57	5086.7
254.08	5645.79	3413.4	5140.23	5053.9
253.08	5253.85	3491.48	4744.74	5153.24
252.08	5505.04	3693.7	5465.9	5193.12
251.08	4819.82	3359.86	4865.67	4979.85
250.08	5384	3218.01	4785.84	5082.76
249.08	5630.58	3120.57	5013.77	5190.43
248.08	5044.53	3378.65	4758.22	5134.05
247.08	5235.19	3134.08	5192.88	5137.75
246.08	5501.28	3435.92	5214.92	5113.46
245.08	5503.07	3239.98	4707.42	4920.06
244.08	5160.45	3097.28	5302.35	5033.42
243.08	5245.68	3216.23	4598.54	4601.74
242.08	5705.22	3175.95	5230.89	5086.55
241.08	5178.09	3300.18	5447.86	4787.95
240.08	5153.02	3056.03	5362.95	4874.59
239.08	6055.69	3152.4	4970.74	4907.18
238.08	5253.08	2867.16	5116.15	4923.04
237.08	5184.44	3068.21	4883.06	4432.59
236.08	5238.29	3501.97	5057.29	4676.58
235.08	5237.49	2988.34	5041.35	4398.84
234.08	5948.78	3642.58	5374.03	4808.46
233.08	6588.09	3750.52	4850.37	4729.22
232.08	5895.68	3962.69	5311.65	4484.88
231.08	5780.14	3681.06	4984.41	4519.3
230.08	5474.27	3472.51	4916.61	5375.71
229.08	5716.25	3291.71	4781.45	5071.74
228.08	5557.1	3569.86	4927.29	4932.8
227.08	5191.09	3552.99	4753.15	4886.6
226.08	5639.81	3508.99	4894.56	4840.13
225.08	5280.05	3244.68	4760.53	4732.52
224.08	5354.48	3218.4	4595.95	4688.2
223.08	5159.35	3195.87	4997.21	4370.29
222.08	5131.07	3381.26	4933.11	4875.05
221.08	5164.38	3160.12	4987.44	4983.71
220.08	5641.37	3432.13	4981.03	5085.3
219.08	4935.92	3043.65	4848.5	4553.16
218.08	5133.78	3329.89	5109.93	4624.68
217.08	5488.61	3278	5447.4	4815.75
216.08	5437.16	3151.34	4728.33	4674.29
215.08	5265.53	2913.24	5055.85	5128.24
214.08	5424.82	3192.28	5001.27	4643.51
213.08	5483.45	2900.55	4338.74	4666.41
212.08	4774.83	3436.8	4760.31	4278.13
211.08	5016.41	3054.46	4917.43	4599.65
210.08	4783.46	3213.28	4661.51	4316.99
209.08	4742.07	3125.78	4496.87	4961.99
208.08	4689.77	3261.28	5028.25	4715.9
207.08	4933.5	2986.02	4685.1	4536.16
206.08	5038.5	3121.71	4563.9	4250.51
205.08	4844.63	3492.3	4579.17	4535.83
204.08	5087.48	3075.16	4786.51	4458.76
203.08	5023.75	3216.95	4916.08	4478.49
202.08	5057.84	3443.4	4769.56	4446.87
201.08	6058.9	3438.62	4635.59	4824.3
200.08	6473.5	3833.96	5907.23	5114.15
199.08	6408.95	3807.36	5667.29	5349.59
198.08	7559.12	3905.65	6088.58	5879.75
197.08	7265.29	3846.2	5908.88	4992.76
196.08	5766.38	3396.21	5087.44	4680.29
195.08	4847.56	3141.98	4427.9	4740.77
194.08	4785.63	3189.53	4726.77	4229.79
193.08	5212.65	3344.7	4283.2	4812.71
192.08	5012.2	3148.08	4340.69	4311.51
191.08	5102.97	3350.54	4175.11	4618.43
190.08	5425	3147.05	4537.04	4311.44
189.08	4687.58	3410.23	4773.71	4625.58
188.08	5180.74	3194.18	4388.37	4728.16
187.08	5140.17	3323.53	4812.46	4603.48
186.08	5125.8	3156.11	4624.63	4411.52
185.08	4797.95	3213.42	4007.76	4759.94
184.08	4799.7	3344.51	4560.21	4600.79
183.08	4908.72	3180.63	4511	4403.44
182.08	4740.35	3158.95	4748.42	4485.91
181.08	5034.86	3408.91	4548.36	4681.12
180.08	5131.87	3316.46	4188.5	4753.3
179.08	4943.99	2803.46	4790.18	4577.77
178.08	5025.27	3099.69	4570.65	4599.55
177.08	4743.58	3329.28	4526.23	4438.83
176.08	4676.32	3455.14	4563.01	4755.95
175.08	4973.29	2849.17	4745.39	4298.44
174.08	4917.13	3011.46	4704.69	4293.7
173.08	5278.73	3045.01	4475.67	4648.99
172.08	4515.41	3235.85	4340.88	4647.57
171.08	4987.18	3266.22	4556.75	4422.65
170.08	5661.46	3692.18	4855.43	4463.37
169.08	7095.98	4103.08	4882.46	4724.18
168.08	6508.02	4294.76	5331.44	4920.35
167.08	5768.74	3941.71	4956.44	4725.38
166.08	5227.69	3849.54	4690.21	4741.54
165.08	4800.1	3028.76	4842.33	4519.6
164.08	5108.58	3382.09	4930.14	4649.96
163.08	5266.46	3533.95	4812.87	4816.09
162.08	5200.27	3359.35	4362.8	4997.93
161.08	5146.11	2942.43	4580.67	4605.68
160.08	4956.3	2757.25	4661.15	4543.3
159.08	5093.52	3188.43	4693.53	4568.87
158.08	5099.33	3146.91	4637.18	4194.2
157.08	4771.01	3130.17	4636.26	4533.35
156.08	5012.11	3373.24	4955.34	4639.58
155.08	5812.25	3516.34	5466.29	5389.14
154.08	6343.01	4420.72	6832.75	5478.67
153.08	7052.53	4376.28	7145.84	6521.93
152.08	6141.45	3837.48	5903.92	5706.77
151.08	5436.87	3401.15	4776.35	4780.24
150.08	5403.33	3409.95	4822.04	4604.13
149.08	4811.97	2813.36	4631.59	4808.26
148.08	5053.01	3149.59	4459.03	4693.65
147.08	4998.19	3070.52	4661.68	4877.15
146.08	5057.57	3081.12	4408.74	4483.72
145.08	5382.81	3263.89	4485.19	4170.19
144.08	4564.16	3206.77	4556.03	4561.42
143.08	5056.24	3546.57	4808.5	4266.35
142.08	4794.12	3522.69	4698.52	4521.22
141.08	4992.72	3073.39	4860.45	4571.6
140.08	4733.83	3498.2	4743.19	4600.22
139.08	5137.34	3107.11	4652.85	4830.54
138.08	4889.71	2943.19	4389.53	4751.32
137.08	5383.74	3286.78	5083.92	4614.78
136.08	4749.23	3059.86	4676.01	4269.21
135.08	4927.57	2951.67	4697	4352.07
134.08	5155.79	3239.04	4427.77	4797.61
133.08	4681.42	2967.03	4635.72	4565.97
132.08	4396.84	3405.85	4691.15	4795.95
131.08	5153.44	3308.17	4758.27	4296.21
130.08	5184.1	3163.31	4847.46	4648.72
129.08	5215.05	3258.61	4525.08	4484.95
128.08	4999.83	2853.28	4871.27	4668.5
127.08	4759.53	3189.98	4476.26	4787.02
126.08	5139.84	3142.54	4725.99	4435.28
125.08	4655.17	3121.42	4734.7	4676.28
124.08	4979.38	3160.8	4845.44	4699.51
123.08	4835.86	3173.48	4882.05	4302.53
122.08	4898.45	3510.55	4661.94	4667.84
121.08	4997.94	3233.87	4444.67	4507.97
120.08	5151.25	3117.61	4583.3	4510.84
119.08	5241.32	3371.4	4754.67	4711.08
118.08	5062.19	3905.51	4693.89	4614.71
117.08	5279.24	3225.88	4554.99	4652.7
116.08	4662.3	2881.47	5023.73	4223.71
115.08	5069.63	3109.64	4629.52	4877.64
114.08	5040.15	3410.71	4810.67	4498.1
113.08	4889.59	3000.6	4828.25	4834.84
112.08	4831.66	3485.26	4674.76	4839.53
111.08	4827.83	3595.95	4966.34	4499.98
110.08	5330.88	3331.72	4672.09	4537.38
109.08	5358.98	3457.13	4579.03	4405.72
108.08	5035.3	3614.06	5200.76	4824.84
107.08	5216.04	3235.31	4812.32	4664.85
106.08	5301.21	2876.42	4988.61	4548.19
105.08	5117.59	3277.9	4674.18	4657.4
104.08	5464.44	3555.81	5207.81	4818.72
103.08	6848.79	4491.72	6369.47	5817.04
102.08	7971.91	5169.32	7203.38	7276.45
101.08	6213.37	3879.57	5804.47	5790.18
100.08	5378.24	3100.72	4883.59	5271.82
99.08	4536.5	3404.52	4867.99	4363.88
98.08	5235.86	3301.68	4689.99	5014.28
97.08	5146.68	3231.53	4531.92	4722.78
96.08	4809.52	3474.73	5089.08	5094.77
95.08	4655.82	3298.04	4817.28	4832.64
94.08	5378	3073.3	4687.74	4433.67
93.08	5070.54	3157.65	4934.34	4518.67
92.08	4917.77	3469.4	4826.23	5039.08
91.08	5103.69	3821.18	4844.57	4649.96
90.08	5025.4	3649.67	5029.42	5470
89.08	5177.89	3770.89	5062.93	5240.22
88.08	5293.42	3116.54	5240.9	4911.07
87.08	5004.08	3426.56	4854.18	4721.63
86.08	4887.9	3314.53	4975.85	5269.78
85.08	4748.57	3843.96	5086.21	5426.69
84.08	4927.77	3149.01	5185.78	4881.18
83.08	5098.68	3366.49	4743.31	4839.91
82.08	4771.14	3754.74	4925.34	4825.32
81.08	5276.24	3567.36	4900.16	4901.42
80.08	5625.43	3364.48	5124.85	4613.51
79.08	5515.64	3629.1	5260.38	5494.14
78.08	5461.76	3445.38	4975.42	4667.62
77.08	5343.75	3253.01	4543.65	5096.68
76.08	5797.38	3587.08	4759.62	4941.8
75.08	5295.9	3623.44	5297.31	5005.07
74.08	5411.37	3418.47	4990.4	5125.18
73.08	5325.27	3482.66	4618.53	5077.55
72.08	5338.56	3635.76	4433.03	5065.94
71.08	5324.76	3462.56	5040.75	5130.91
70.08	5469.32	2969.74	5100.75	4619.38
69.08	5284.26	3235.39	5255.43	4597.04
68.08	5579.83	3393.1	5151.1	4691.4
67.08	5250.42	3543.79	4872.14	4940.78
66.08	5197.52	3897.76	4934.67	4827.67
65.08	5538.6	3662.02	4804.91	5132.5
64.08	5786.7	3396.59	5087.89	4584.8
63.08	5363.16	3510.88	5215.39	5301.48
62.08	5626.33	3236.88	4699.7	4752.9
61.08	5599.86	3682.25	4676.66	5015.41
60.08	5465.49	3412.3	5190.08	4761.52
59.08	5302.68	3804.4	5279.34	5193.04
58.08	5105.99	3406.33	4766.89	5209.2
57.08	5195.33	3804.02	4880.61	4979.75
56.08	5620.8	3465.26	4976.63	5256.71
55.08	5583.1	3440.19	5210.1	5247.71
54.08	5688.83	3538.8	5239.71	5237.05
53.08	5542.22	3656.88	5074.8	5158.55
52.08	5697.32	3866.14	5099.82	5635.49
51.08	5673.17	3662.5	5423.25	5728.07
50.08	6213.71	3526.19	5370.29	5070.66
49.08	6097.59	3865.78	5750.8	5550.61
48.08	5994.41	4128.91	5492.14	4785
47.08	5712.34	3675.15	5444.82	5147.27
46.08	5632.61	3887.21	5395.26	5249.59
45.08	5773.26	3868.43	5332.92	5469.15
44.08	5109.78	3788.32	5936.53	4950.15
43.08	5553.83	3531.66	5234	5284.46
42.08	5663.44	3536.54	5384.04	5229.96
41.08	5522.81	3683.08	5516.18	4851.06
40.08	5314.79	3661.78	5380.25	4901.7
39.08	5014.7	3295.85	4860.68	4855.99
38.08	4498.83	3217.06	4716.7	4726.54
37.08	4939.07	2864.05	4356.47	4629.18
36.08	5418.25	3153.57	4650.37	4633.48
35.08	5052.16	3168.55	4795.79	4715.08
34.08	5371.15	3276.58	4835.72	4188.18
33.08	4408.12	3249.01	4582.07	4847.82
32.08	4672.83	3386.59	4681.22	4622.72
31.08	5265.93	3542.25	4839.38	4669.67
30.08	5732.91	3961.79	5250.14	5284.14
29.08	6065.96	3919.37	5538.77	5776.77
28.08	7271.37	4596.83	6533.98	6886.04
27.08	8382.74	5505.11	7473.3	7937.72
26.08	9227.36	6090.97	8355.91	8598.07
25.08	9210.64	6038.54	8058.76	7851.76
24.08	7758.91	5342.88	7775.94	7195.47
23.08	7060.01	4449.47	6291.67	6184.46
22.08	5467.84	4499.39	5832.56	5540.96
21.08	5131.77	3449.61	5055.88	5153.99
20.08	5516.93	3453.44	4665.33	5534.9
19.08	6293.97	4384.33	5649.28	6197.64
18.08	6467.79	4748.11	6814.26	6073.24
17.08	6502.83	4149.85	5466.49	5727.51
16.08	6153.81	3814.87	5876.72	5548.64
15.08	5847.72	4146.41	5217.77	4917.25
14.08	5284.43	3047.56	4914.28	4550.1
13.08	4404.61	2664.77	3726.17	3962.66
12.08	3826.09	2490.09	3588.59	3626.55
11.08	5087.15	3218.99	4545.05	4373.21
10.08	4794	3218.13	4321.39	4096.71
9.08	3629.13	2179.71	3570.94	3335.78
8.08	3316.79	2276.41	2939.67	3102.93
7.08	2479.39	1695.1	2285.61	2541.24
6.08	1992.52	1277.11	1526.09	1654.67
5.08	2053.54	1325.61	1817.91	1768.15
4.08	2497.32	1509.21	2357.17	1927.59
3.08	1526.42	655.513	1152.51	959.905
2.08	365.652	238.119	288.303	298.772
1.08	210.022	140.225	130.044	131.765
0.08	104.977	51.5655	85.6294	151.144
-0.92	75.164	21.8794	39.7332	46.9308
-1.92	94.7988	52.7401	80.4801	46.7461
-2.92	54.3752	26.1247	66.0167	46.097
-3.92	50.8495	41.5215	58.1184	26.3399
-4.92	63.7847	10.9505	54.751	42.1824
-5.92	54.764	54.7659	52.7932	12.5733
-6.92	40.0231	43.8224	27.2151	21.9111
-7.92	47.6326	10.9589	51.4597	66.6017
-8.92	21.9232	36.5655	32.8853	42.9876
-9.92	32.8922	10.6133	32.8921	2.27018
